# Supplementary material for: Sequencing, Assembling, and Correcting Draft Genomes Using Recombinant Populations
Source: PubMed Central journal article supplement (PMC4059239; doi:10.1534/g3.114.010264), 2014-02-13
Supplement: supp_g3.114.010264_010264SI.pdf [file supp_g3.114.010264_010264SI.pdf]

## **Sequencing, assembling, and correcting draft genomes using recombinant populations**

Matthew W. Hahn<sup>\*§,1</sup>, Simo V. Zhang<sup>§</sup>, and Leonie C. Moyle<sup>\*</sup>

<sup>\*</sup>Department of Biology and <sup>§</sup>School of Informatics and Computing, Indiana University, Bloomington, IN 47405

<sup>1</sup>Corresponding author. 1001 E. 3<sup>rd</sup> St., Indiana University, Bloomington, IN 47405. E-mail: mwh@indiana.edu, Phone: (812)856-7001.

**DOI: 10.1534/g3.114.010264**

The truth:

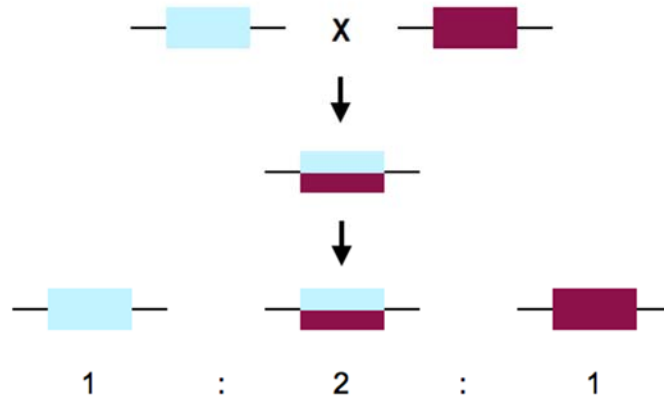

What you observe:

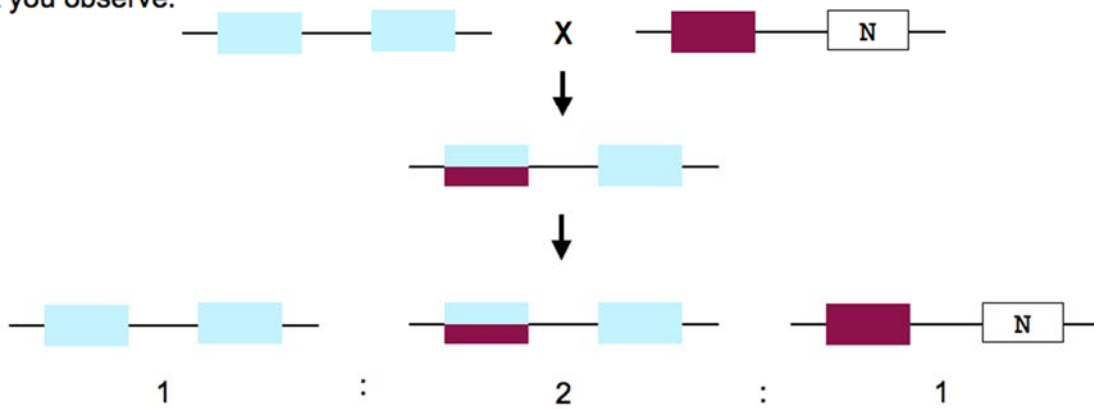

**Figure S1** Alternate pattern of segregation of split alleles through an  $F_2$  cross. The top panel shows the physical reality of a single gene that differs in allelic sequence between the parents. The  $F_1$  and half the  $F_2$ s are heterozygous. The bottom panel shows how, when alleles are split into two loci, one locus retains the allelic variation while the other contains only one allele (i.e. does not show a SNP). In individuals that have the blue allele at the first locus, the second locus also shows the blue allele. In individuals homozygous for the red allele, however, the second locus shows missing data at the corresponding site. Note that the pattern of segregation at the first locus is as expected.

**File S1**

**RPGC Manual**

Available for download as a PDF file at <http://www.g3journal.org/lookup/suppl/doi:10.1534/g3.114.010264/-/DC1>
